# Supplementary material
Source: Springer Nature journal article supplement (https://www.springermedizin.de/resource/supplementary/12885_2011_2887_MOESM5_ESM.pdf/9462232)
Supplement: MOESM5 [file 9462232]

Annual rate  
per 100000

400  
350  
300  
250  
200  
150  
100  
50  
0

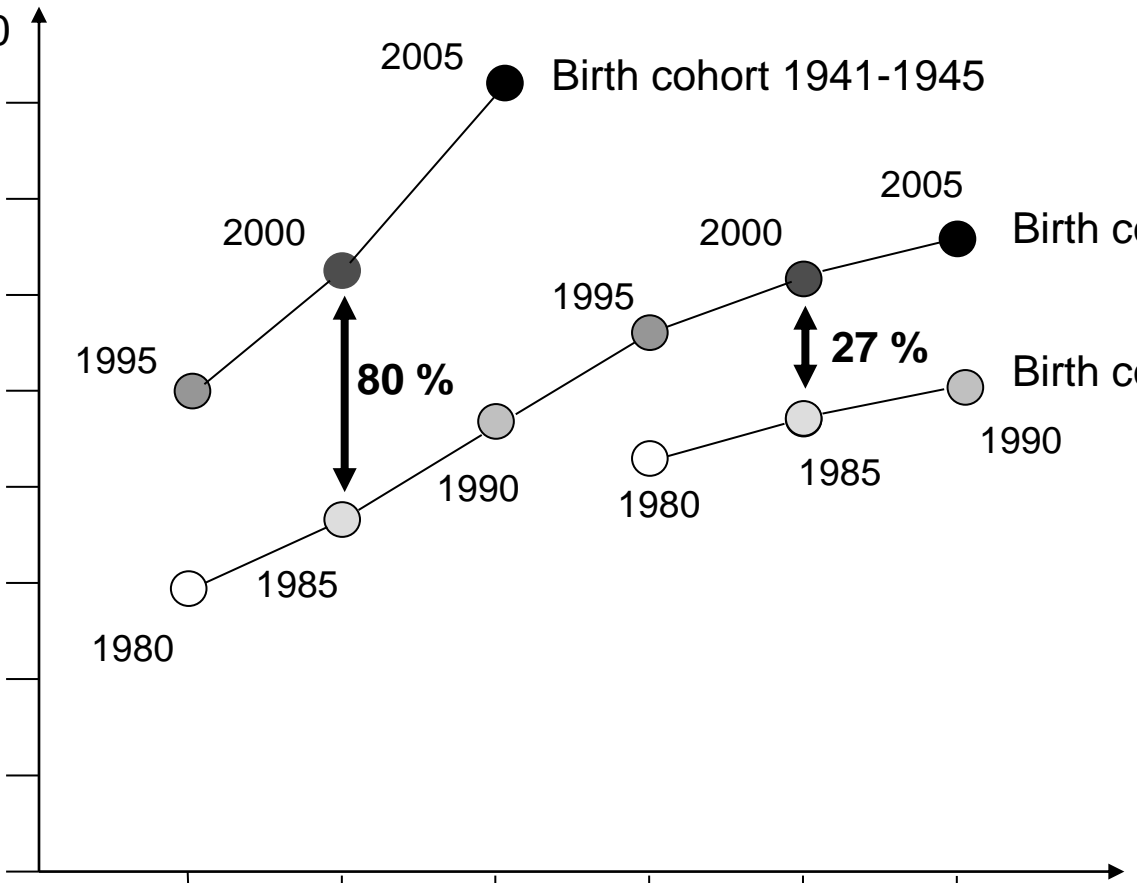

2005 Birth cohort 1941-1945

2005 Birth cohort 1926-1930

2005 Birth cohort 1926-1930

2005 Birth cohort 1911-1915

80 %

27 %

Age group

○ 1980 to ● 1990: lower screening;    ● 1995 to ● 2005: higher screening
